# Supplementary material
Source: PubMed Central journal article supplement (PMC2764909)
Supplement: 0905073106_0905073106SI.pdf [file 0905073106_0905073106SI.pdf]

# Supporting Information

Kung et al. 10.1073/pnas.0905073106

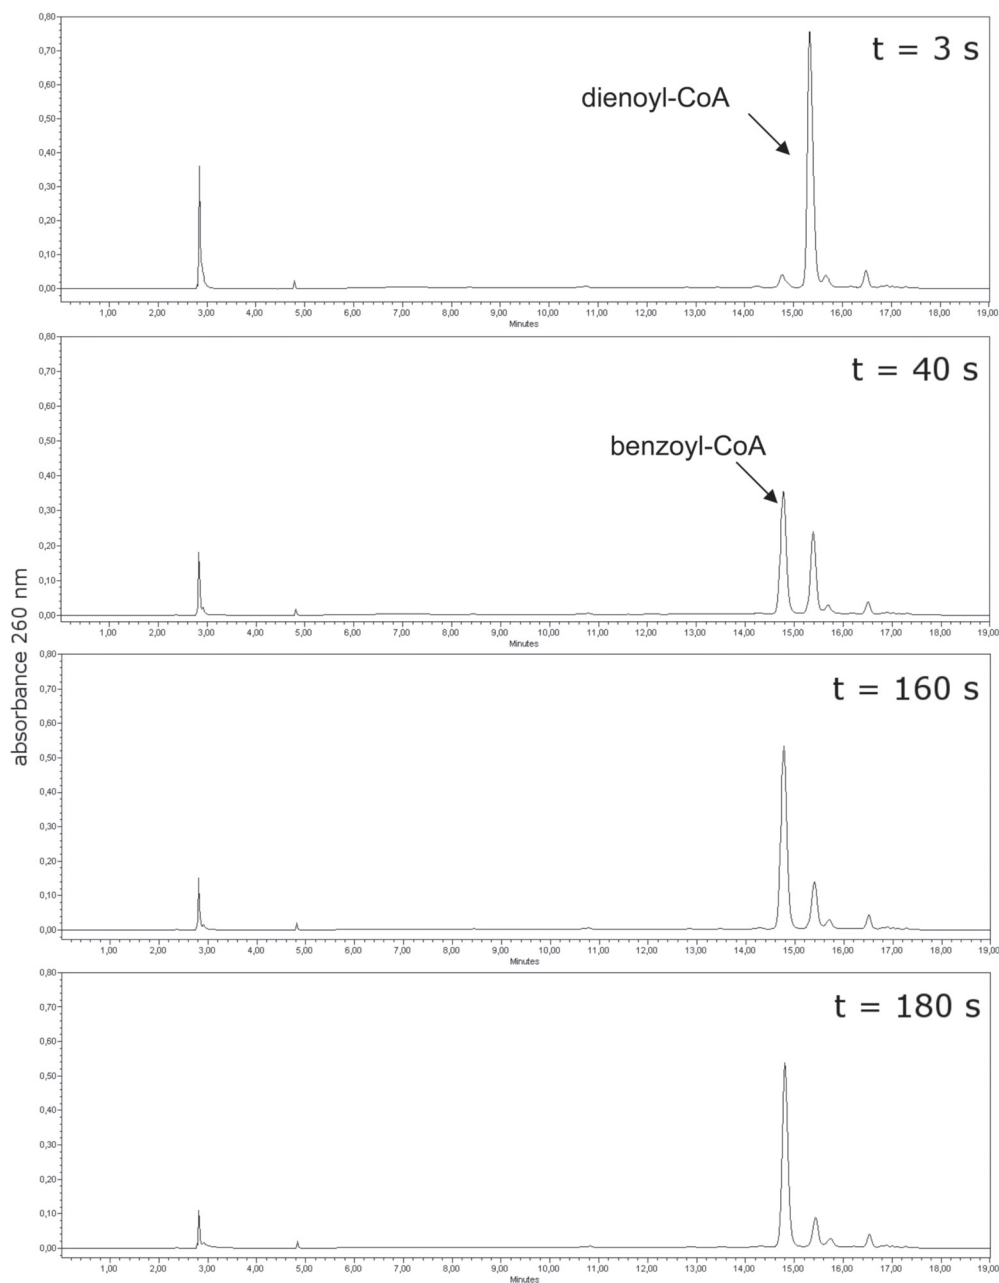

**Fig. S1.** HPLC analysis of time-dependent formation of benzoyl-CoA (BCoA) from dienoyl-CoA by BamBC. The assay (400  $\mu$ L) contained 0.4 mM DCPIP, 0.2 mM dienoyl-CoA and 0.8  $\mu$ g purified BamBC. After different time points, samples were taken and subjected to reversed phase HPLC analysis by using an acetonitrile gradient. Elution times and identification of compounds by their typical UV/vis spectra correspond to those reported in ref. 1.

1. Thiele B, Rieder O, Golding BT, Müller M, Boll M (2008) Mechanism of enzymatic Birch reduction: Stereochemical course and exchange reactions of benzoyl-CoA reductase. *J Am Chem Soc* 130:14050–14051.

## Other Supporting Information Files

[Table S1 \(XLS\)](#)
